# Supplementary material for: Genetic and Environmental Factors and Cardiovascular Disease Risk in Adolescents
Source: PubMed Central journal article supplement (PMC10656641; doi:10.1001/jamanetworkopen.2023.43947), 2023-11-17
Supplement: jamanetwopen-e2343947-s002.pdf [file jamanetwopen-e2343947-s002.pdf]

## **Data Sharing Statement**

Ballin. Genetic and Environmental Factors and Cardiovascular Disease Risk in Adolescents. *JAMA Netw Open*. Published November 17, 2023. doi:10.1001/jamanetworkopen.2023.43947

### **Data**

**Data available:** No
